# Supplementary material for: Superparamagnetic bimetallic cyanide-bridged coordination nanoparticles with TB = 9 K
Source: Royal Society of Chemistry journal article supplement (doi:10.1039/b516425g), 2006-01-01
Supplement: b516425g.pdf [file b516425g.pdf]

## Electronic Supporting Information

### Superparamagnetic Bimetallic Cyanide-bridged Coordination Nanoparticles with $T_B = 9$ K

Laure Catala,<sup>\*a</sup> Alexandre Gloter,<sup>b</sup> Odile Stephan,<sup>b</sup> Guillaume Rogez,<sup>c</sup> and Talal Mallah<sup>\*a</sup>

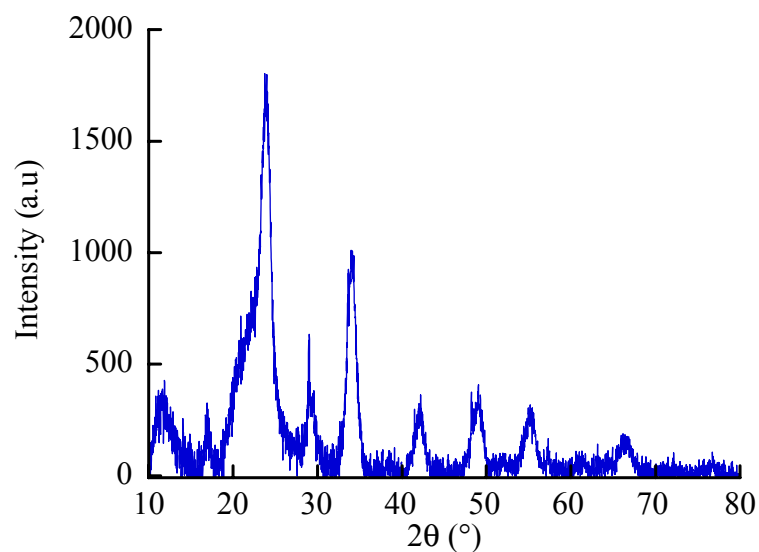

**Figure S1.** X-ray powder diffraction diagram of the nanoparticles

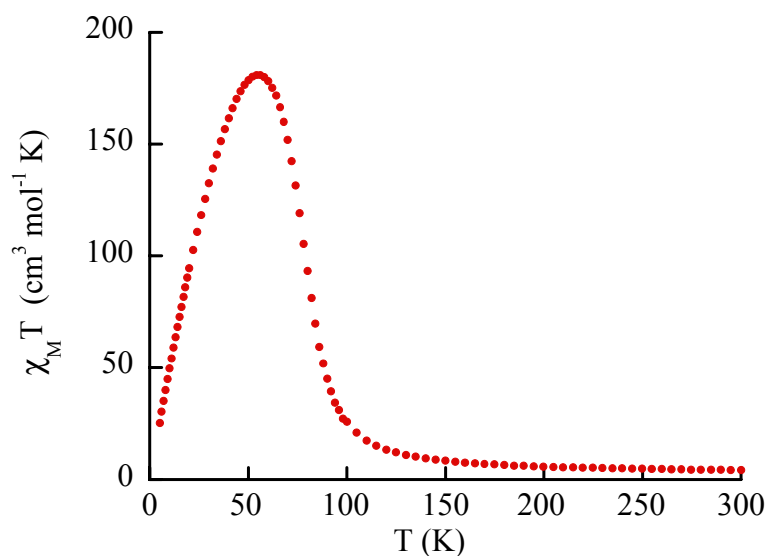

**Figure S2.**  $\chi_M T = f(T)$  within a field of 0.5 T for **1**

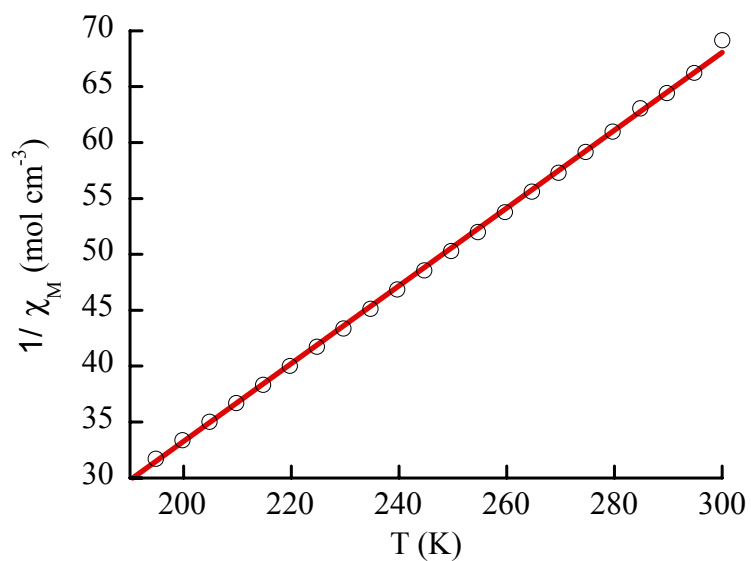

**Figure S3.**  $1/\chi_M = f(T)$  between 200 and 300 K (○) experimental, (—) best fit

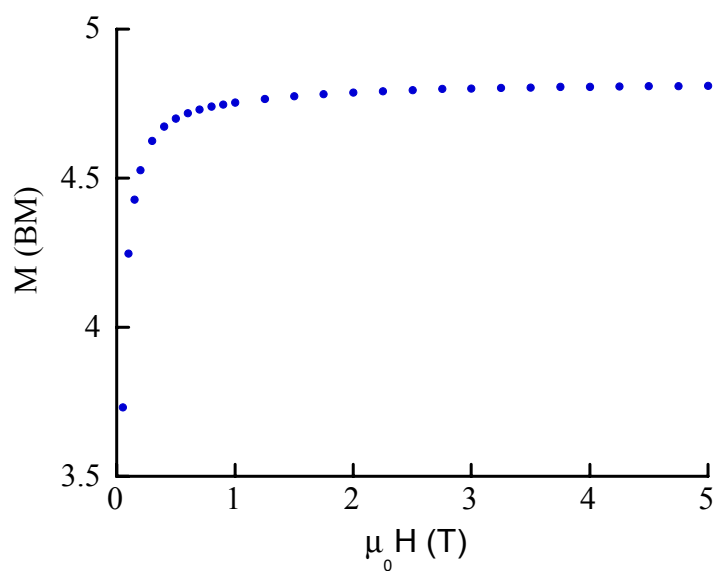

**Figure S4.** Magnetization vs field at  $T = 2\text{K}$  for **1**

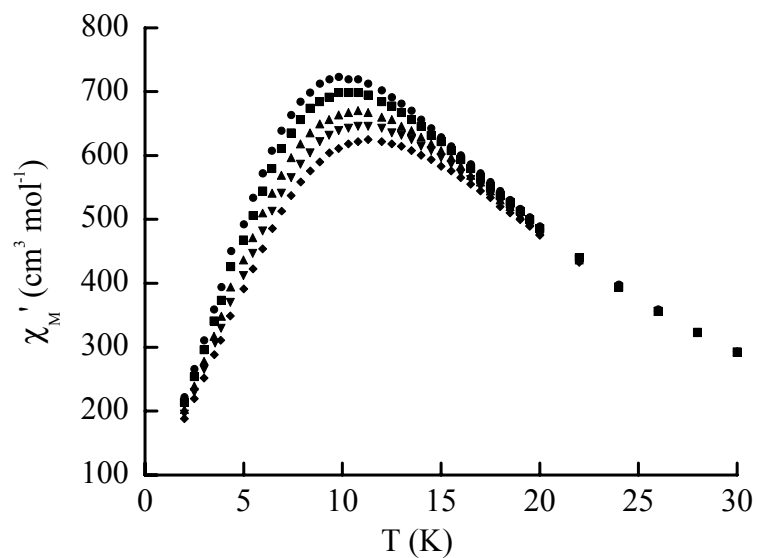

**Figure S5.** In-phase ( $\chi_M'$ ) component of the ac susceptibility vs. temperature at 50 (●), 100 (■), 250 (▲), 500 (▼) and 1000 (◆) Hz for **1**

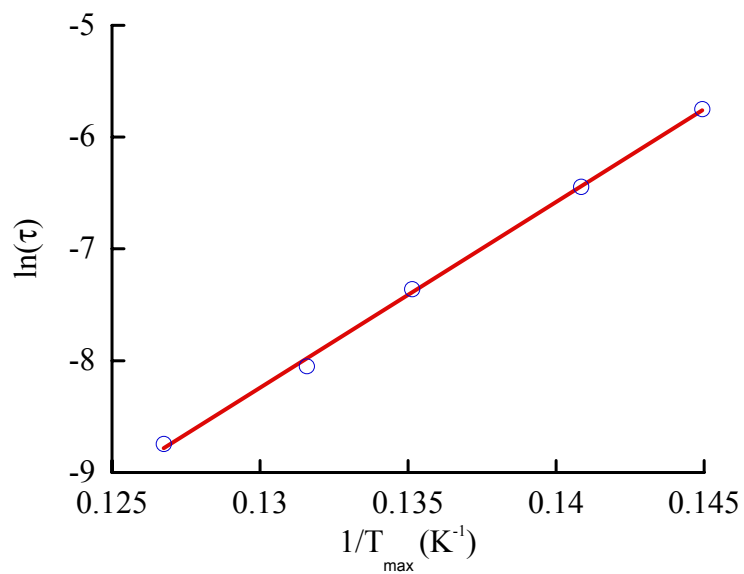

**Figure S6.**  $\ln(\tau) = f(1/T_{\text{max}})$  for **1** (○) experimental, (—) best fit
